# Supplementary material
Source: PubMed Central journal article supplement (PMC3764851)

## **SUPPLEMENTAL DATA**

**Manuscript title: Detailed analysis of biased histamine H<sub>4</sub> receptor signalling by JNJ7777120 analogues**

**Authors:** S Nijmeijer, H F Vischer, F Sirci, S Schultes, H Engelhardt, C de Graaf, E M Rosethorne, S J Charlton, R Leurs

**Supplemental Table 1. Overview of potency and intrinsic activity values in a  $\beta$ -arrestin2 recruitment and CRE-luciferase assay.** Intrinsic activity is calculated as percentage of maximal histamine (HA) response. Data shown are pooled data from at least three experiments performed in duplicate. Error bars indicate SEM values.

**Supplemental Figure 1. Effect of different basic side chains influence compound intrinsic activity in  $\beta$ -arrestin2 recruitment.** U2OS-H<sub>4</sub>R cells were stimulated with indicated amount of indolecarboxamides. A) R5-Cl, R7-CH<sub>3</sub> B) R7-F C) R7-CH<sub>3</sub>. Intrinsic activity is plotted as percentage of maximal histamine (HA) response. Data shown are pooled data from at least three experiments performed in duplicate. Error bars indicate SEM values.

| Compound |           | β-arrestin2 recruitment |                      | Compound |           | β-arrestin2 recruitment |                      |
|----------|-----------|-------------------------|----------------------|----------|-----------|-------------------------|----------------------|
| #        | Structure | pEC <sub>50</sub>       | Intrinsic act. (%HA) | #        | Structure | pEC <sub>50</sub>       | Intrinsic act. (%HA) |
| 75*      |           | 6.0(0.09)               | 95 (4.1)             | 26       |           | 5.4(0.08)               | 44 (6.1)             |
| 35       |           | 6.4(0.12)               | 75 (4.8)             | 41       |           | 7.8(0.10)               | 44 (4.1)             |
| 48       |           | 8.0(0.11)               | 63 (4.5)             | 22       |           | 6.1(0.06)               | 42 (4.0)             |
| 50       |           | 7.8(0.10)               | 63 (4.0)             | 59       |           | 5.8(0.10)               | 41 (3.9)             |
| 28       |           | 7.0(0.03)               | 62 (4.3)             | 21       |           | 5.6(0.02)               | 39 (3.5)             |
| 1        |           | 8.0(0.12)               | 62 (4.2)             | 46       |           | 6.8(0.13)               | 38 (2.2)             |
| 47       |           | 8.3(0.13)               | 59 (1.1)             | 72       |           | 6.2(0.09)               | 37 (2.5)             |
| 51       |           | 8.2(0.20)               | 58 (4.2)             | 20       |           | 6.2(0.00)               | 37 (1.3)             |
| 29       |           | 7.4(0.07)               | 57 (2.8)             | 67       |           | 7.5(0.19)               | 36 (3.3)             |
| 49       |           | 7.9(0.12)               | 57 (2.4)             | 69       |           | 6.2(0.07)               | 36 (2.2)             |
| 76       |           | 6.9(0.12)               | 57 (1.5)             | 64       |           | 6.4(0.06)               | 36 (1.3)             |
| 2        |           | 7.5(0.12)               | 56 (3.6)             | 19       |           | 5.3(0.08)               | 36 (0.9)             |
| 70       |           | 7.3(0.06)               | 55 (4.0)             | 71       |           | 7.2(0.12)               | 35 (0.8)             |
| 18       |           | 7.0(0.12)               | 53 (0.8)             | 63       |           | 7.1(0.09)               | 33 (4.7)             |
| 12       |           | 6.5(0.12)               | 52 (2.8)             | 54       |           | 6.2(0.12)               | 33 (1.6)             |
| 17       |           | 6.9(0.07)               | 52 (1.3)             | 57       |           | 5.6(0.07)               | 32 (3.5)             |
| 56       |           | 6.5(0.09)               | 51 (3.8)             | 31       |           | 6.8(0.09)               | 30 (1.4)             |
| 74       |           | 7.4(0.06)               | 50 (0.4)             | 45       |           | 5.9(0.09)               | 29 (2.5)             |
| 36       |           | 7.2(0.13)               | 49 (3.9)             | 61       |           | 5.4(0.07)               | 28 (3.2)             |
| 43       |           | 7.0(0.10)               | 48 (4.8)             | 66       |           | 5.6(0.08)               | 24 (2.3)             |
| 55       |           | 7.1(0.03)               | 48 (4.8)             | 73       |           | 6.6(0.11)               | 19 (1.9)             |
| 10       |           | 7.2(0.07)               | 47 (4.2)             | 53       |           | 6.6(0.07)               | 18 (2.4)             |
| 77       |           | 6.7(0.09)               | 46 (1.9)             | 44       |           | 6.0(0.07)               | 14 (3.4)             |
| 68       |           | 6.7(0.13)               | 45 (2.3)             | 65       |           | 6.0(0.12)               | 13 (2.5)             |

\*NB. **75** is the only compound that displays agonism in CRE luciferase assay:  
 Eff=105±5%, pEC<sub>50</sub>=6.4±0.1

# Supplemental Figure 1

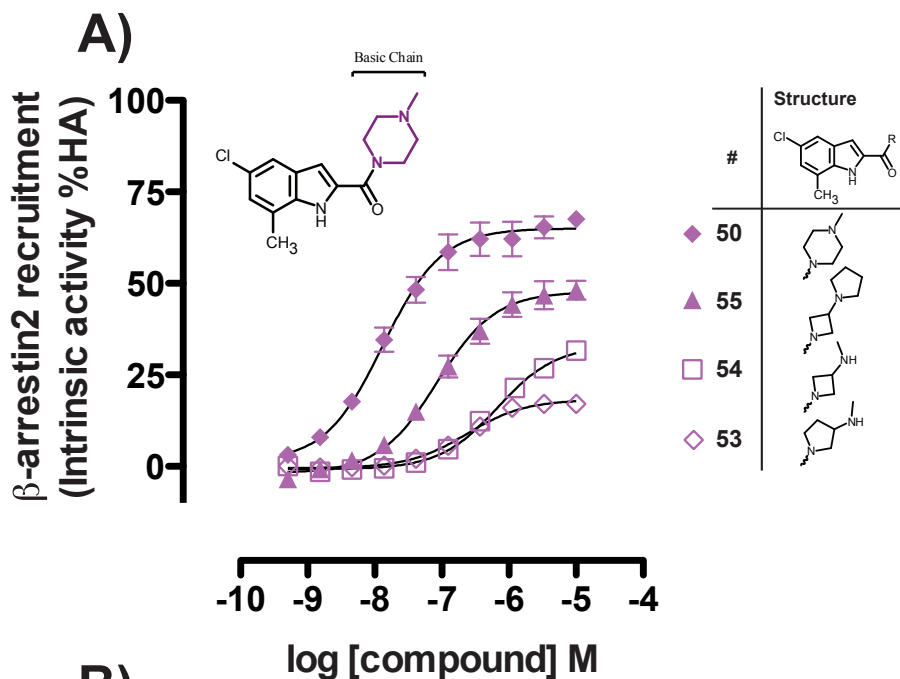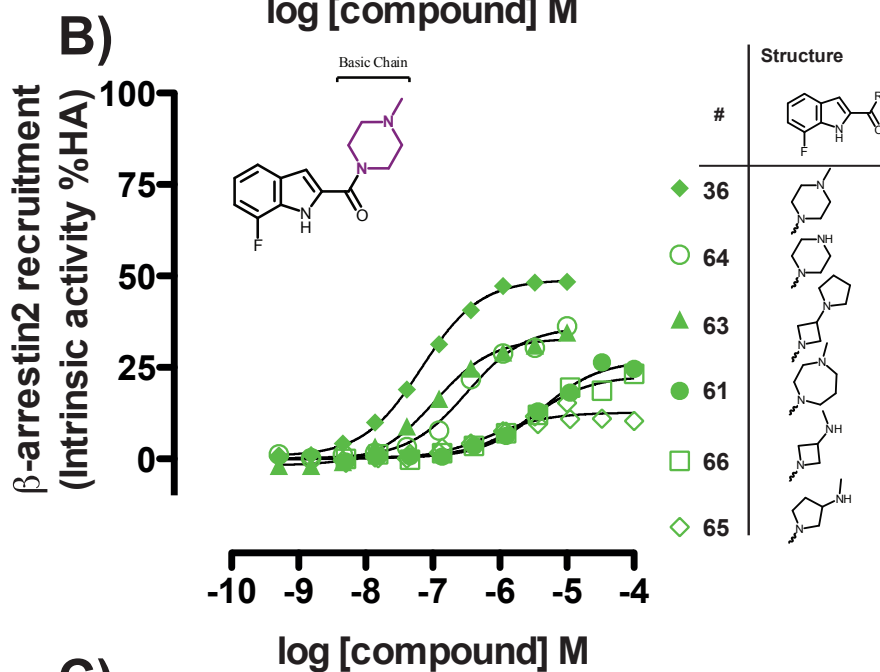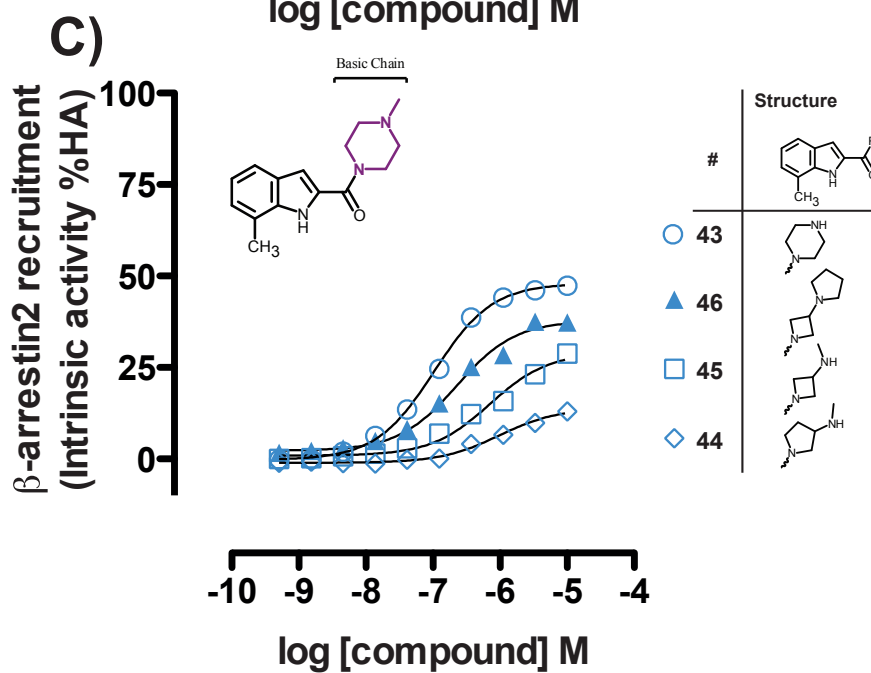

Supplement: bph0170-0078-SD1.pdf [file bph0170-0078-SD1.pdf]
